# Supplementary material
Source: Elsevier journal article supplement (https://www.sciencedirect.com/science/article/pii/S0213911123000183)
Supplement: mmc1 [file S0213911123000183:mmc1.doc]

**Apéndice**

**A1. Cuestionario**

**1. Información de contexto:**

1. ¿Cuál es la titulación universitaria que está cursando actualmente?

1. Enfermería
2. Fisioterapia
3. Medicina
4. Odontología

2. ¿En qué universidad cursa dicha titulación?

1. Universidad de Barcelona
2. Universidad de Cantabria
3. Universidad de Cartagena de Indias
4. Universidad Autónoma de Nicaragua

3. ¿Con que género se identifica?

1. Hombre
2. Mujer
3. Otros géneros

4. Año de nacimiento

5. ¿Cuál es (o era, en caso de fallecimiento) el nivel de estudios más alto completado por su madre? ¿Y por su padre? En caso de que padre/madre sean del mismo sexo, utilice ambas casillas indistintamente

*Titulación de la madre: Titulación del padre:*

1. Educación primaria o inferior
2. Educación secundaria
3. Educación universitaria
4. No sabe/no contesta
5. No pertinente

6. ¿Ha recibido algún tipo de formación en temas de género durante su etapa universitaria?

1. Sí
2. No 🡪 *Salte a la pregunta 8*
3. No sabe/no contesta 🡪 *Salte a la pregunta 8*

7. En caso de que haya recibido formación en temas de género en la universidad, fundamentalmente ha sido mediante:

1. Asignatura o asignaturas específicas
2. Enfoque del profesorado
3. Seminarios y conferencias

8. Valore, en su opinión, la necesidad de introducir la perspectiva de género en la titulación/carrera que está cursando:

0 Ninguna atención……………………………………10 Máxima atención

9. Valore, en su opinión, la necesidad de introducir la perspectiva de género en la titulación/carrera que está cursando:

0 No hay necesidad……………………………………10 Gran necesidad

**2. Ámbito Sanitario. Escala Abreviada de Conciencia de Género**

Ahora vienen algunas preguntas relativas a lo que podría ser su futura práctica profesional. ¿Podría indicarnos su grado de acuerdo o desacuerdo con las siguientes afirmaciones? (0 totalmente en desacuerdo y 10 totalmente de acuerdo).

1. El género de su paciente es irrelevante, excepto cuando deban considerarse los problemas de salud específicos de cada sexo (p. ej., patologías de próstata o de útero).

2. Ignorar las diferencias de género puede impedirle identificar adecuadamente los problemas de salud de su paciente.

3. Al comunicarse con su paciente, no deben importarle su sexo ni su orientación sexual.

4. El conocimiento de las diferencias de género en la salud y la enfermedad aumenta la calidad de la atención sanitaria.

5. La atención sanitaria debería considerar más las experiencias vitales y las necesidades de las personas trans*.

6. Normalmente, las pacientes mujeres piden mayor atención y se quejan más por su estado de salud que los pacientes hombres.

7. Normalmente, los hombres solo piden atención sanitaria si su problema de salud es importante.

8. Normalmente, las mujeres realizan más consultas sanitarias por síntomas difíciles de identificar.

9. Normalmente, los hombres son más claros y directos en la explicación de sus dolencias.

10. Normalmente, las personas trans* demandan más atención sanitaria de la que realmente necesitan.

11. Las profesionales sanitarias prolongan en exceso sus consultas en comparación con sus compañeros varones.

12. Los profesionales sanitarios varones son más eficientes que sus compañeras de profesión.

13. Las profesionales sanitarias tienen más empatía y más sensibilidad con sus pacientes que sus compañeros varones.

14. Los profesionales sanitarios varones pueden afrontar mayor carga de trabajo que sus compañeras.

15. Los profesionales sanitarios varones tienen mejores expectativas laborales que sus compañeras de profesión (p. ej., contratos más estables o mejores salarios).

**A2. Propuesta de ítems para la Escala Abreviada de Conciencia de Género en Ciencias de la Salud (EACGCS)**

| **v29** El género de su paciente es irrelevante, excepto cuando deban considerarse los problemas de salud específicos de cada sexo. |
| --- |
| **v30** Ignorar las diferencias de género puede impedirle identificar adecuadamente los problemas de salud de su paciente. |
| **v31** Al comunicarse con su paciente, no deben importarle su sexo ni su orientación sexual. |
| **v32** El conocimiento de las diferencias de género en la salud y la enfermedad aumenta la calidad de la atención sanitaria. |
| **v33** La atención sanitaria debería considerar más las experiencias vitales y las necesidades de las personas trans*. |
| **v34** Normalmente, las mujeres piden mayor atención y se quejan más por su estado de salud que los hombres. |
| **v35** Normalmente, los hombres solo piden atención sanitaria si su problema de salud es importante. |
| **v36** Normalmente, las mujeres realizan más consultas sanitarias por síntomas difíciles de identificar. |
| **v37** Normalmente, los pacientes hombres son más claros y directos en la explicación de sus dolencias. |
| **v38** Normalmente, las personas trans* demandan más atención sanitaria de la que realmente necesitan. |
| **v39** Las profesionales sanitarias prolongan en exceso sus consultas en comparación con sus compañeros varones. |
| **v40** Los profesionales sanitarios son más eficientes que sus compañeras de profesión. |
| **v41** Las profesionales sanitarias tienen más empatía y más sensibilidad con sus pacientes que sus compañeros varones. |
| **v42** Los profesionales sanitarios pueden afrontar mayor carga de trabajo que sus compañeras de profesión. |
| **v43** Los profesionales sanitarios tienen mejores expectativas laborales que sus compañeras de profesión. |
